# Supplementary material for: Effect of the Type VI Secretion System Secreted Protein Hcp on the Virulence of Aeromonas salmonicida
Source: MDPI journal article supplement (doi:10.3390/microorganisms10122307), 2022-11-22
Supplement: s1 [file s1]

Supplementary Material Table S1. qRT-PCR primer sequences

| Primer Name | Primers sequence for the qRT-PCR (5'→3') |
|-------------|------------------------------------------|
| <i>hcp</i>  | F: CAAGCAGGAGCACTTTTC                    |
|             | R: CTGTGTGTTCCCAGTCAAT                   |
| 16S         | F: TTGATTACACTCCTCGCCTAAC                |
|             | R: CAGCCAACCTGCCGTACTCT                  |
